# Supplementary material for: A Systematic Review of Structural and Functional MRI Studies Investigating Social Networking Site Use
Source: MDPI journal article supplement (doi:10.3390/brainsci13050787), 2023-05-11
Supplement: s1 [file s1]

**Supplementary Table S1.** Quality assessment ratings for structural MRI studies adapted from EPHPP criteria

[illegible]

|                                                                                                              |      |          |      |          |      |      |      |      |      |
|--------------------------------------------------------------------------------------------------------------|------|----------|------|----------|------|------|------|------|------|
| 3. Has the study adjusted for multiple comparisons if appropriate? (yes/ not applicable = 1; no/unclear = 0) | 1    | 1        | 1    | 1        | 1    | 1    | 0    | 1    | 1    |
| 4. Are statistical methods appropriate for study design/sample size? (yes = 1; no/unclear = 0)               | 1    | 0        | 1    | 0        | 1    | 1    | 1    | 1    | 1    |
|                                                                                                              |      |          |      |          |      |      |      |      |      |
| <b>Total score (0-10)</b>                                                                                    | 10   | 7        | 9    | 7        | 10   | 9    | 8    | 9    | 9    |
| <b>Global rating (High = 10-8; Moderate = 5-7; Low = 0-4)</b>                                                | High | Moderate | High | Moderate | High | High | High | High | High |

**Supplementary Table S2.** Quality assessment ratings for resting state fMRI studies adapted from EPHPP criteria

|                                                                                                                                | Hu, Cui, et al. (2022) | Hu, Yu, et al. (2022) | Lee et al. (2021) | Meshi et al. (2016) | Wilmer et al. (2019) | Zhang and Mo (2016) |
|--------------------------------------------------------------------------------------------------------------------------------|------------------------|-----------------------|-------------------|---------------------|----------------------|---------------------|
| <b>A. Selection bias</b>                                                                                                       |                        |                       |                   |                     |                      |                     |
| 1. Are the individuals selected to participate likely to be representative of the target population? (yes = 1; no/unclear = 0) | 0                      | 0                     | 1                 | 0                   | 0                    | 0                   |
|                                                                                                                                |                        |                       |                   |                     |                      |                     |
| <b>B. Study design</b>                                                                                                         |                        |                       |                   |                     |                      |                     |
| 1. Was sample size sufficient or derived from a power calculation? (yes = 1; no = 0)                                           | 0                      | 0                     | 1                 | 1                   | 0                    | 0                   |
| 2. Are inclusion and exclusion criteria clearly described? (yes = 1; no = 0)                                                   | 1                      | 1                     | 1                 | 1                   | 1                    | 1                   |
| 3. Were appropriate details of sample characteristics included? (yes = 1; no = 0)                                              | 1                      | 1                     | 1                 | 1                   | 1                    | 0                   |
|                                                                                                                                |                        |                       |                   |                     |                      |                     |
| <b>C. Neuroimaging methodology</b>                                                                                             |                        |                       |                   |                     |                      |                     |
| 1. Is a validated method of data acquisition used? (yes = 1; no/unclear = 0)                                                   | 1                      | 1                     | 1                 | 1                   | 1                    | 1                   |
| 2. Is a validated method of data processing used? (yes = 1; no/unclear = 0)                                                    | 1                      | 1                     | 1                 | 1                   | 1                    | 1                   |
|                                                                                                                                |                        |                       |                   |                     |                      |                     |
| <b>D. Analysis</b>                                                                                                             |                        |                       |                   |                     |                      |                     |
| 1. Was analysis hypothesis driven? (yes = 1; no/unclear = 0)                                                                   | 0                      | 1                     | 1                 | 1                   | 1                    | 1                   |
| 2. Has the study controlled for potential confounders? (yes = 1; no = 0)                                                       | 1                      | 1                     | 1                 | 1                   | 1                    | 0                   |

|                                                                                                              |          |          |           |          |          |          |
|--------------------------------------------------------------------------------------------------------------|----------|----------|-----------|----------|----------|----------|
| 3. Has the study adjusted for multiple comparisons if appropriate? (yes/ not applicable = 1; no/unclear = 0) | 1        | 1        | 1         | 1        | 0        | 1        |
| 4. Are statistical methods appropriate for study design/sample size? (yes = 1; no/unclear = 0)               | 1        | 1        | 1         | 1        | 1        | 1        |
|                                                                                                              |          |          |           |          |          |          |
| <b>Total score (0-10)</b>                                                                                    | <b>7</b> | <b>8</b> | <b>10</b> | <b>9</b> | <b>7</b> | <b>6</b> |
| <b>Global rating (High = 10-8; Moderate = 5-7; Low = 0-4)</b>                                                | Moderate | High     | High      | High     | Moderate | Moderate |



|                                                                                                              |      |              |      |              |      |      |      |      |      |      |              |      |              |
|--------------------------------------------------------------------------------------------------------------|------|--------------|------|--------------|------|------|------|------|------|------|--------------|------|--------------|
| 1. Was analysis hypothesis driven? (yes = 1; no/unclear = 0)                                                 | 1    | 1            | 1    | 1            | 1    | 1    | 1    | 1    | 1    | 1    | 1            | 1    | 1            |
| 2. Has the study controlled for potential confounders? (yes = 1; no = 0)                                     | 1    | 0            | 1    | 0            | 1    | 1    | 1    | 1    | 1    | 1    | 1            | 1    | 1            |
| 3. Has the study adjusted for multiple comparisons if appropriate? (yes/ not applicable = 1; no/unclear = 0) | 1    | 1            | 1    | 1            | 1    | 1    | 1    | 1    | 1    | 1    | 1            | 1    | 1            |
| 4. Are statistical methods appropriate for study design/sample size? (yes = 1; no/unclear = 0)               | 0    | 0            | 1    | 0            | 1    | 1    | 1    | 1    | 1    | 1    | 0            | 1    | 1            |
|                                                                                                              |      |              |      |              |      |      |      |      |      |      |              |      |              |
| <b>Total score (0-10)</b>                                                                                    | 8    | 7            | 9    | 6            | 10   | 9    | 9    | 8    | 8    | 8    | 7            | 10   | 7            |
| <b>Global rating (High = 10-8; Moderate = 5-7; Low = 0-4)</b>                                                | High | Mod<br>erate | High | Mod<br>erate | High | High | High | High | High | High | Mod<br>erate | High | Mod<br>erate |
